# Supplementary material
Source: MDPI journal article supplement (https://www.mdpi.com/2673-4605/6/1/4)

# PARC\_CL 2.1 crack model

PROPOSE a reliable numerical model for the cyclic and dynamic response prevision of EXISTING Reinforced Concrete structures subjected to CORROSION

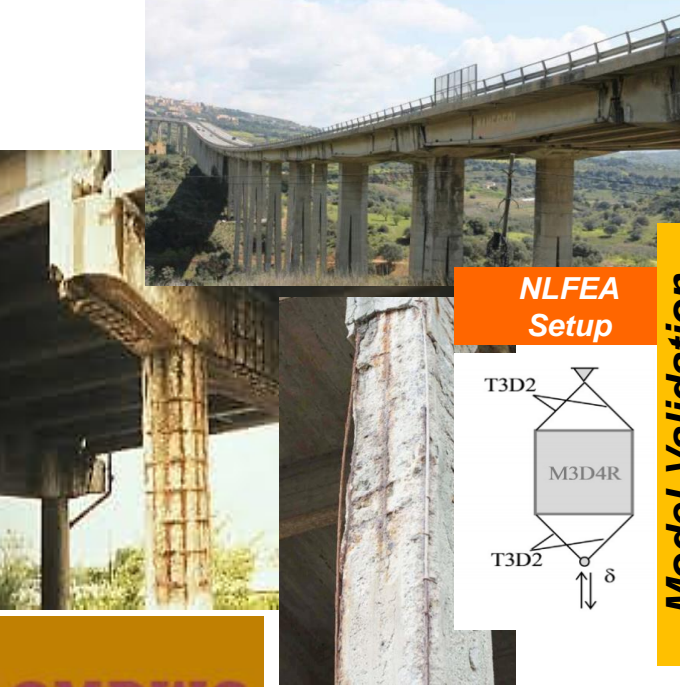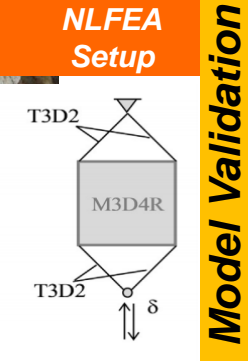

**Model Validation**

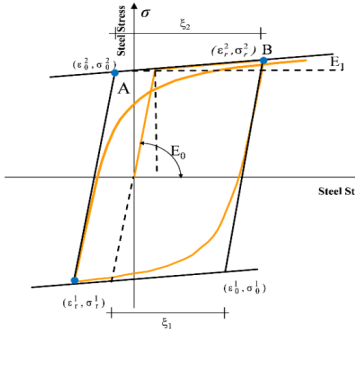

# A Smeared Fixed Crack Model

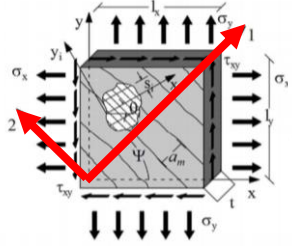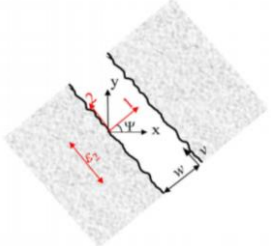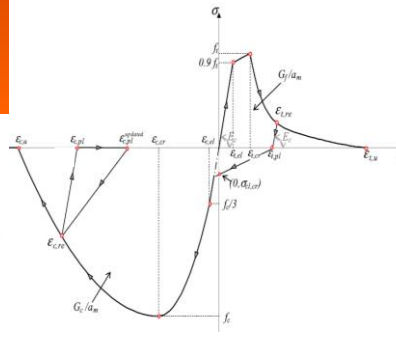

**ABAQUS**

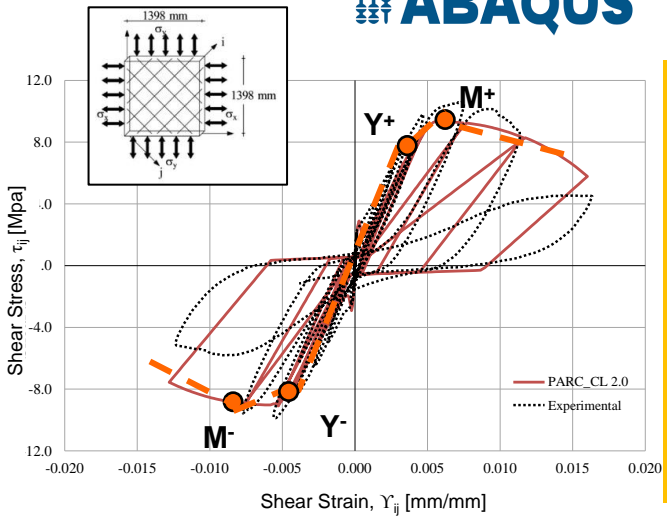

**Corrosion Effects**

Response of Corroded Panel over the time

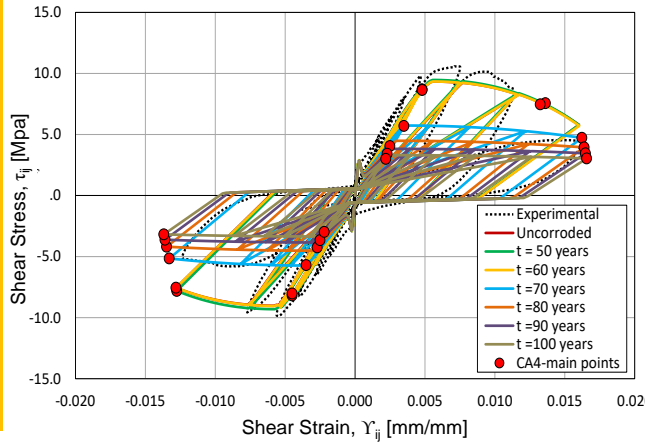

## Modelling of Time-Dependent Behaviour of Corroded RC Elements

1<sup>st</sup> Corrosion and Materials Degradation Web Conference

17-19 May 2021 | International Workshop Online  
 Francesca Vecchi, Lorenzo Franceschini, Beatrice Belletti

Department of Engineering and Architecture, University of Parma, 43124 Parma, Italy

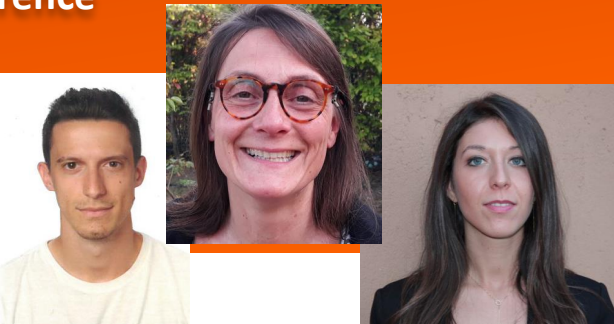

**CMDWC 2021**

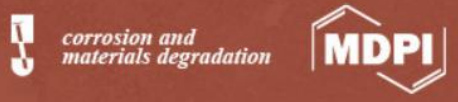

Email:

[lorenzo.franceschini@unipr.it](mailto:lorenzo.franceschini@unipr.it);

[francesca.vecchi@unipr.it](mailto:francesca.vecchi@unipr.it);

[beatrice.belletti@unipr.it](mailto:beatrice.belletti@unipr.it);

CMDWC  
2021

# Modelling of time-dependent behaviour of corroded reinforced concrete elements

Francesca Vecchi, Lorenzo Franceschini, Beatrice Belletti

*Department of Engineering and Architecture, University of Parma, 43124 Parma, Italy*

CMDWC 2021

1<sup>st</sup> Corrosion and Materials Degradation Web Conference

17-19 May 2021 | International Workshop Online

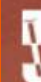

corrosion and  
materials degradation

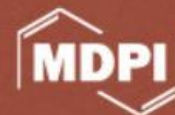

# Outline of the research

## ❖ Introduction

### ❖ Aims of the study

#### ❖ PARC\_CL 2.1 crack model

- General overview of the model;

#### ❖ Effects of corrosion

- Corrosion rate evaluation based on different exposure classes;
- Mechanical properties reduction;

#### ❖ Model Validation

#### ❖ Main results

#### ❖ Conclusions and Further research

# Introduction:

## Significant Attention from researchers all over the world

Corrosion is recognised as one of the main factors that leads RC structures to premature unexpected failure.

- ▶ An accurate study on the serviceability, durability and safety performance needs to be carried out.

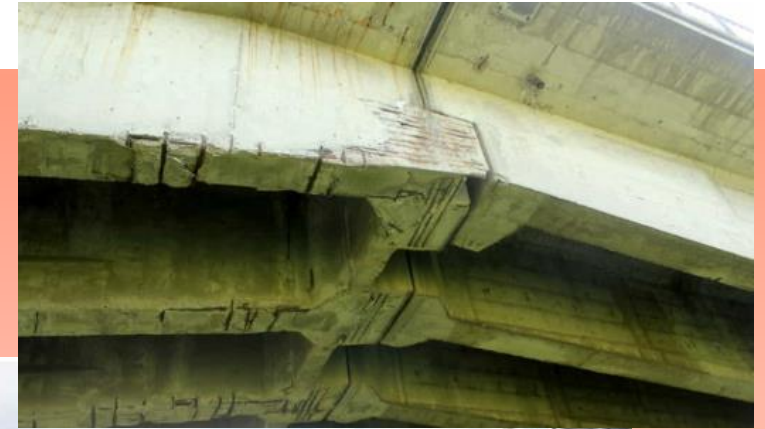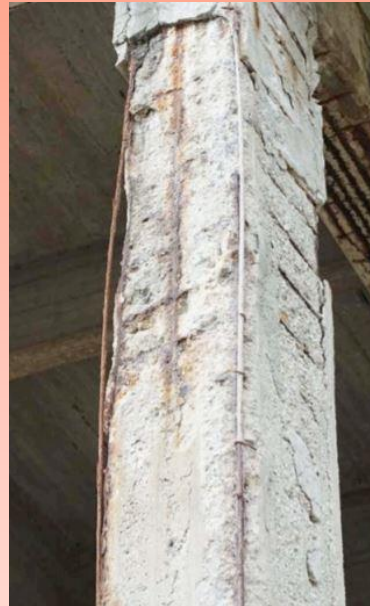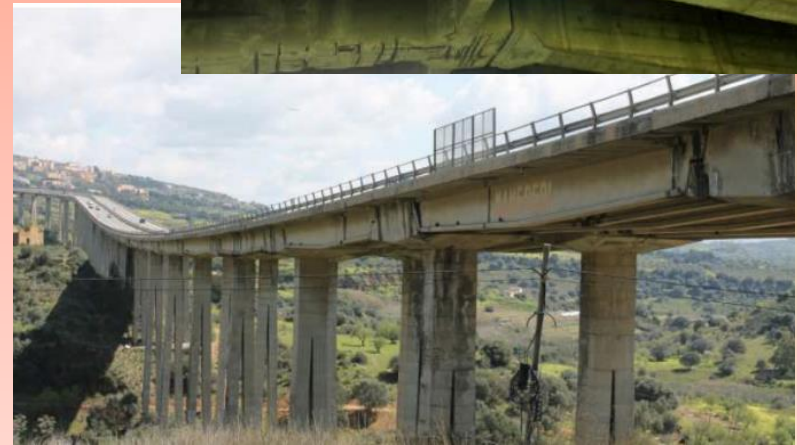

RC structures designed and built before the entry into force of seismic codes represent a source of seismic risk worldwide due to their vulnerability

# AIMS OF THE STUDY

- 1** TO PROPOSE a reliable numerical model:
  - for the cyclic and dynamic response prevision of **EXISTING** Reinforced Concrete structures subjected to **CORROSION**;
- 2** TO VALIDATE the model by means of the comparison with experimental results.
- 3** TO APPLY the validated model for the prediction of the **ULTIMATE RESISTANCE** and **DUCTILITY** of corroded RC structures over the time.



# Physical Approach for Reinforced Concrete subjected to Cyclic Loading: PARC CL 2.1 crack model

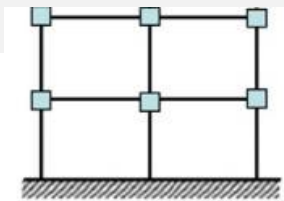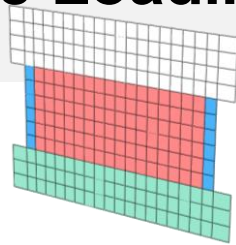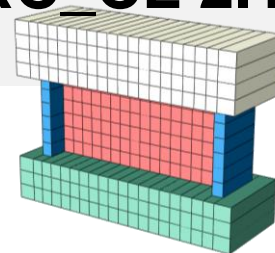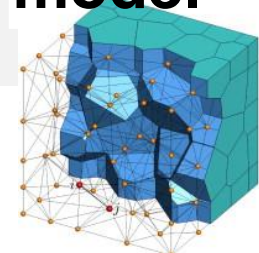

|      | Beam elements                                                                                                                  | 2D elements                                                                                                             | 3D elements                                                                                          | Discrete                                                                                                                                                      |
|------|--------------------------------------------------------------------------------------------------------------------------------|-------------------------------------------------------------------------------------------------------------------------|------------------------------------------------------------------------------------------------------|---------------------------------------------------------------------------------------------------------------------------------------------------------------|
|      | The structure is divided in <b>one-dimensional</b> elements.<br>-lumped plasticity or<br>-distributed plasticity (fibre model) | The structure is characterised by <b>two-dimensional elements</b> with translational and rotational degrees of freedom. | The structure is divided by <b>three-dimensional elements</b> with translational degrees of freedom. | The structure is idealized as a set of rigid part ( <b>aggregates</b> ) interconnected by springs with axial and tangential stiffness ( <b>cement past</b> ). |
| PROS | Limited computational costs                                                                                                    | Limited computational costs and uncertainties respect to 3D modelling.                                                  | Possibility to analyze complex structural typologies                                                 | Capability to catch physical and mechanical phenomena in detail.                                                                                              |
| CONS | Only flexural failure of thin elements:<br>no shear or torsional effects.                                                      | Shortcomings in evaluating shear behaviour along the thickness of the element                                           | Elevated computational costs<br>Uncertainties due to modelling choices                               | Elevated computational costs <u>which reduce the scope of these models to limited parts of a structure.</u>                                                   |

COMPLEXITY – COMPUTATIONAL EFFORTS

# Physical Approach for Reinforced Concrete subjected to Cyclic Loading: PARC\_CL 2.1 crack model

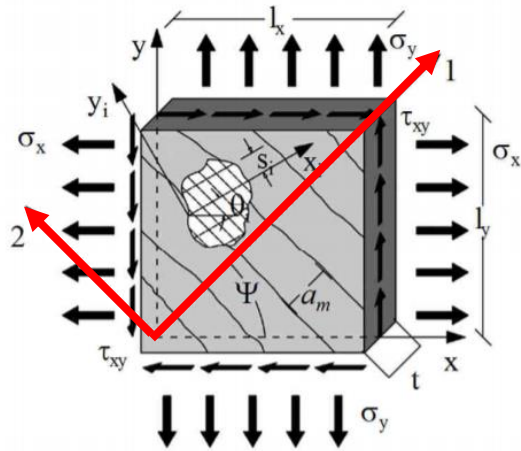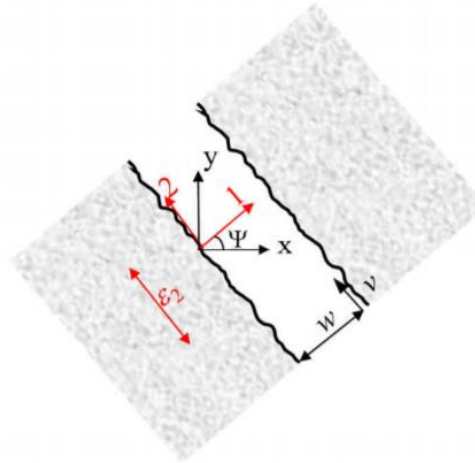

Implemented in a user subroutine  
UMAT.for for the software

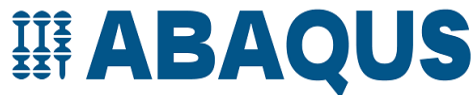

## Smeared Fixed Crack Model

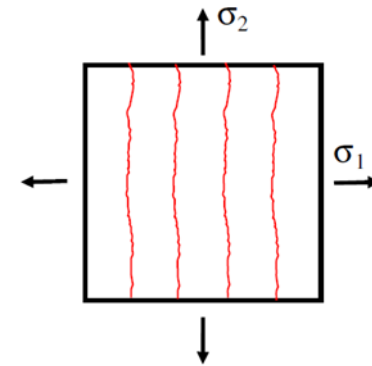

It treats the cracked solid as a continuum by reducing stiffness properties.

It hypothesises the starting crack pattern as fixed during the analyses

the prediction of **shear stresses** generated along the cracks becomes very important

# Physical Approach for Reinforced Concrete subjected to Cyclic Loading: PARC\_CL 2.1 crack model

Belletti B., Scolari M., Vecchi F. (2017a). PARC\_CL 2.0 crack model for NLFEA of reinforced concrete structures under cyclic loadings. *Computers and Structures*, 191(2017):165–179.

Uniaxial model for concrete:  
**He-Wu**

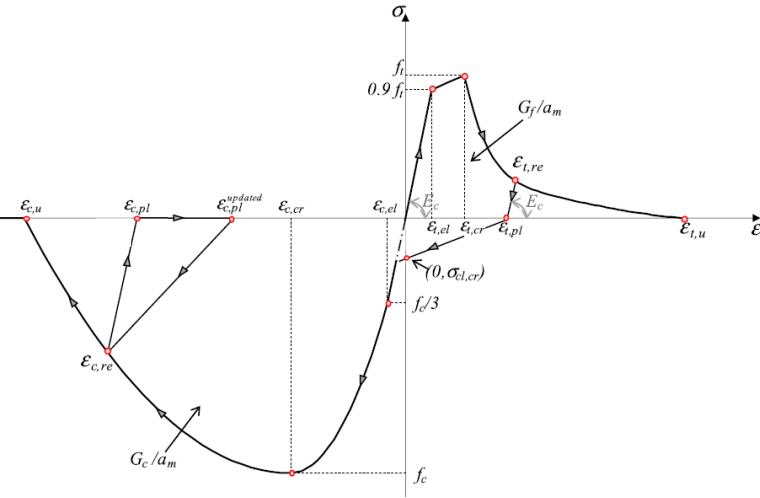

Uniaxial model for steel:  
**Menegotto -Pinto**

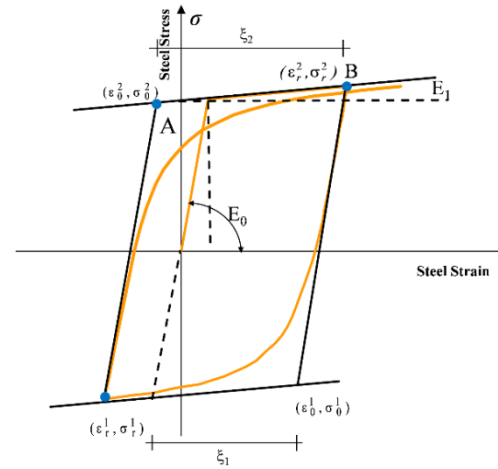

Aggregate interlock:  
**Gambarova**

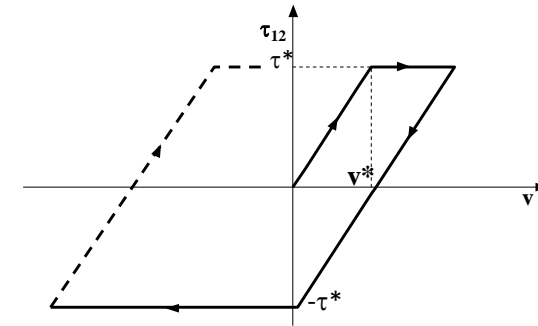

Biaxial state for concrete in compression:  
**Vecchio - Collins**

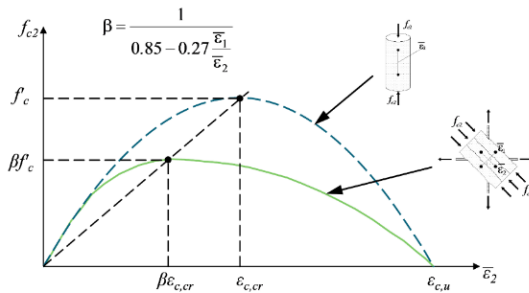

Tension Stiffening:  
**MC2010**

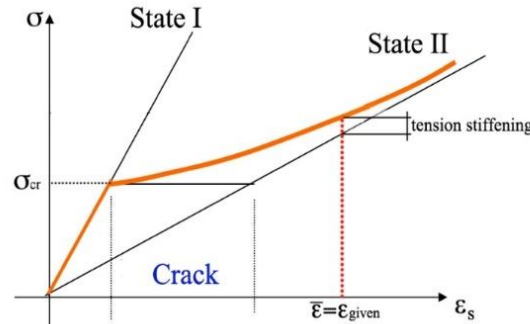

Shrinkage effect

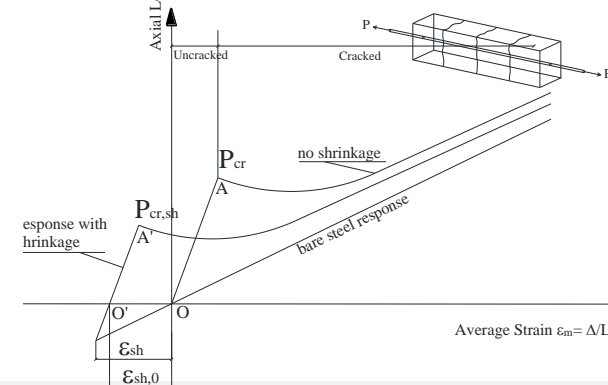



# EFFECTS OF CORROSION

The corrosion process can drastically:

- ▶ reduce the resisting section of the reinforcement
- ▶ modify the mechanical response of the reinforcement
- ▶ determine the cracking of the surrounding concrete
- ▶ influence the bond between steel and concrete

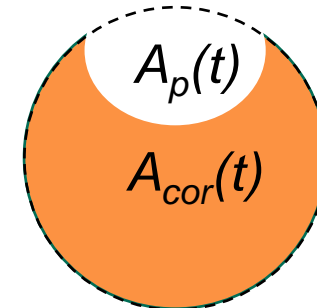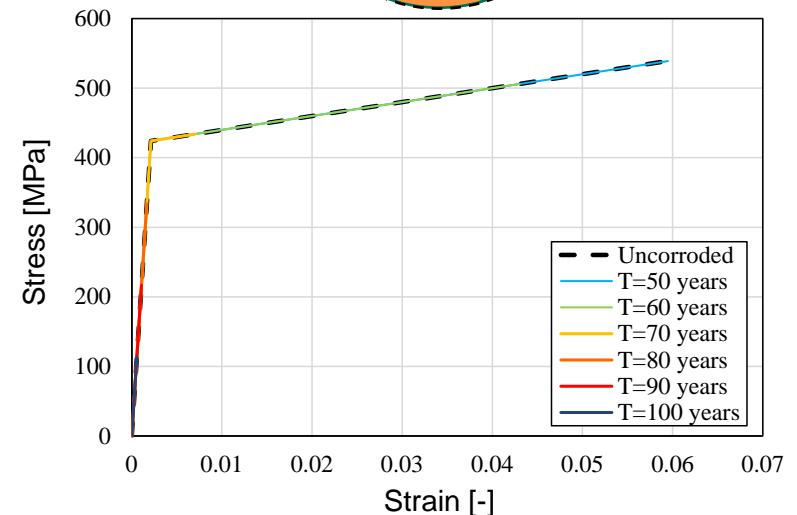

All these effects are to be included in NLFEA in order to obtain a reliable prediction of the RC element behaviour

# EFFECTS OF CORROSION

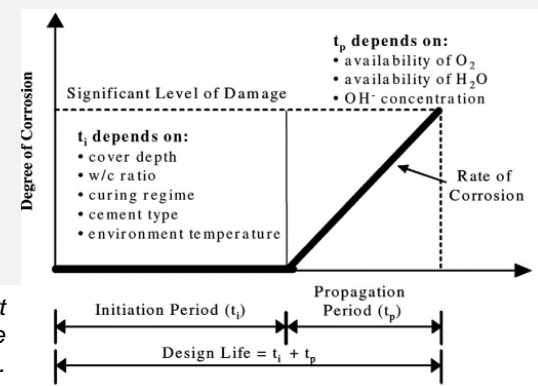

Tuutti K. Corrosion of Steel in Concrete Report 4-82. Swedish Cement and Concrete Research Institute, Sweden, (1982).

## Evaluation of the Initiation Period

$$C(x,t) = C_i + (C_{sa} - C_i) \left[ 1 - \operatorname{erf} \left( \frac{x}{2\sqrt{D_{cl}t}} \right) \right]$$

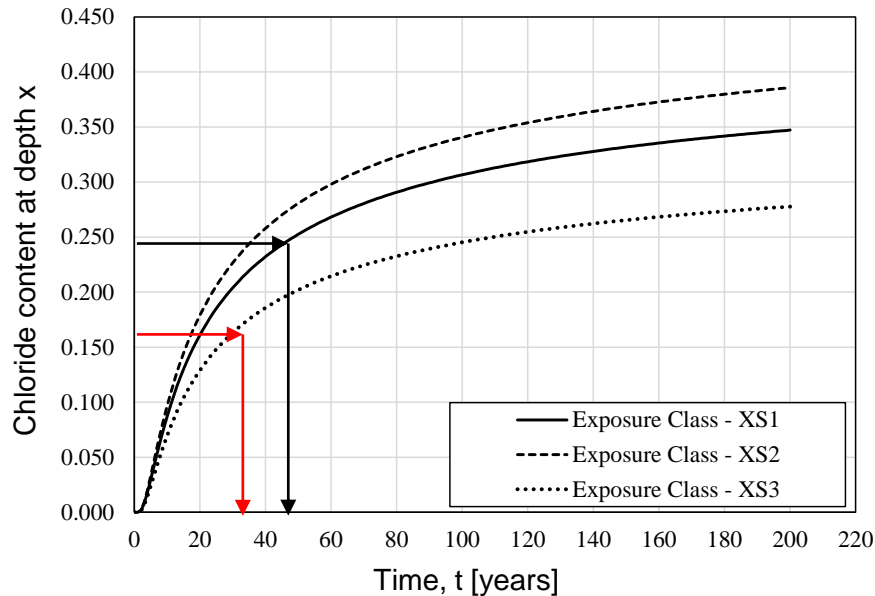

| Input Parameter                                               |            |            |            |
|---------------------------------------------------------------|------------|------------|------------|
| Exposure Class                                                | <b>XS1</b> | <b>XS2</b> | <b>XS3</b> |
| Cover, x [mm]                                                 | 45.00      | 45.00      | 45.00      |
| Initial Chloride Content, $C_i$ [%]                           | 0.00       | 0.00       | 0.00       |
| Diffusion Coefficient, $D_{cl}$ [ $\text{cm}^2/\text{year}$ ] | 0.61       | 0.61       | 0.61       |
| Critical Chloride Content, $C_{cr}$ [%]                       | 0.25       | 0.25       | 0.17       |
| Chloride Content at surface, $C_{sa}$ [%]                     | 0.45       | 0.50       | 0.36       |

| Steel                            |     |     |     |
|----------------------------------|-----|-----|-----|
| Exposure Class                   | XS1 | XS2 | XS3 |
| Initiation Period, $t_i$ [years] | 48  | 37  | 33  |

CONTECVET IN30902I. A validated user's manual for assessing the residual life of concrete structures. (2001). DG Enterprise, CEC.

## Evaluation of the Propagation Period

$$t_p = t - t_i$$

$t_i$  : Initiation period – Depassivation time

$t$  : Time of the assessment

$t_p$  : Propagation period

# EFFECTS OF CORROSION

CONTECVET IN30902I. A validated user's manual for assessing the residual life of concrete structures. (2001). DG Enterprise, CEC.

\* In the Lack of Measurement

## From Corrosion rate to maximum cross-section loss

$$P_{pit}(t) = p(t) = 0.0116\alpha t_p I_{corr}$$

$P_{pit}(t)$ : maximum pit depth at the time of analysis  
 $\alpha$ : pitting factor, set equal to 10  
 $t_p$ : propagation period  
 $I_{corr}$ : corrosion rate

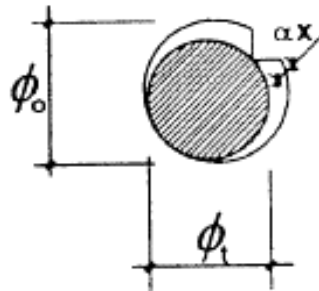

Table C3. Ranges of  $I_{corr}$  values suggested for exposure classes of EN206.

| Exposure Classes                    |                      | $I_{CORR}$ [ $\mu A/cm^2$ ]  |                    |
|-------------------------------------|----------------------|------------------------------|--------------------|
| 0                                   | No risk of corrosion | ~ 0.01                       |                    |
| <b>Carbonation</b>                  |                      | 1.1.1.2 Partially carbonated | Totally carbonated |
| C1                                  | Dry                  | ~ 0.01                       | ~ 0.01             |
| C2                                  | Wet – rarely – Dry   | 0.1 – 0.5                    | 0.2 – 0.5          |
| C3                                  | Moderate humidity    | 0.05 – 0.1                   | 0.1 – 0.2          |
| C4                                  | Cyclic wet – dry     | 0.01 – 0.2                   | 0.2 – 0.5          |
| <b>Chloride initiated corrosion</b> |                      |                              |                    |
| D1                                  | Moderate humidity    | 0.1 – 0.2                    |                    |
| D2                                  | Wet – rarely – dry   | 0.1 – 0.5                    |                    |
| D3                                  | Cyclic wet – dry     | 0.5 – 5                      |                    |
| S1                                  | Airborne sea water   | 0.5 – 5                      |                    |
| S2                                  | Submerged            | 0.1 – 1.0                    |                    |
| S3                                  | Tidal zone           | 1 – 10                       |                    |

### XS1

| Time [years]      | 50   | 60   | 70   | 80   | 90   | 100   |
|-------------------|------|------|------|------|------|-------|
| $P_{pit}(t)$ [mm] | 0.39 | 2.37 | 4.34 | 6.31 | 8.28 | 10.25 |

### XS2

| Time [years]      | 50   | 60   | 70   | 80   | 90   | 100  |
|-------------------|------|------|------|------|------|------|
| $P_{pit}(t)$ [mm] | 0.75 | 1.33 | 1.91 | 2.49 | 3.07 | 3.65 |

### XS3

| Time [years]      | 50   | 60   | 70    | 80    | 90   | 100   |
|-------------------|------|------|-------|-------|------|-------|
| $P_{pit}(t)$ [mm] | 4.93 | 7.83 | 10.73 | 13.63 | 16.5 | 19.43 |

| Input Parameter             |     |     |     |
|-----------------------------|-----|-----|-----|
| Exposure                    | XS1 | XS2 | XS3 |
| $I_{corr}$ [ $\mu A/cm^2$ ] | 1.7 | 0.5 | 2.5 |

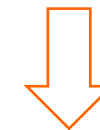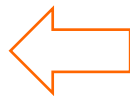

# EFFECTS OF CORROSION

From corrosion rate to **maximum cross-section loss**

$$A_p(t) = \begin{cases} A_1 + A_2 & p(t) \leq \frac{D_0}{\sqrt{2}} \\ \frac{\pi D_0^2}{4} - A_1 + A_2 \frac{D_0}{\sqrt{2}} & \frac{D_0}{\sqrt{2}} < p(t) \leq D_0 \\ \frac{\pi D_0^2}{4} & p(t) > D_0 \end{cases}$$

$$A_1 = \frac{1}{2} \left[ \mathcal{G}_1 \left( \frac{D_0}{2} \right)^2 - a \left| \frac{D_0}{2} - \frac{p(t)^2}{D_0} \right| \right]$$

$$A_2 = \frac{1}{2} \left[ \mathcal{G}_2 (p(t))^2 - a \left( \frac{p(t)^2}{D_0} \right) \right]$$

$$\mathcal{G}_2 = 2 \arcsin \left( \frac{a}{2p(t)} \right)$$

$$a = 2p(t) \sqrt{1 - \left[ \frac{p(t)}{D_0} \right]^2}$$

$$\mathcal{G}_1 = 2 \arcsin \left( \frac{a}{D_0} \right)$$

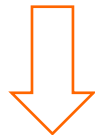

$$\eta_{\max} = \frac{A_{s0} - A_p(t)}{A_{s0}}$$

$\eta_{\max}$  : maximum cross-sectional loss of the corroded rebar

$A_{s0}$  : un-corroded cross-sectional area of rebar

$A_p(t)$  : residual cross-sectional area of rebar

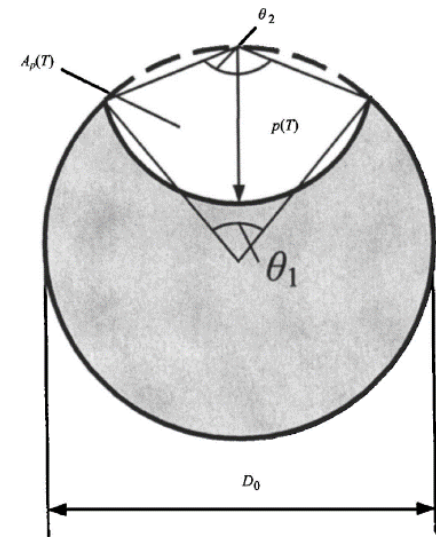

Val Dimitri. Deterioration of RC Beams due to Corrosion and its influence on Beam Reliability. *Journal of Structural Engineering*, 133(9):1297-1306,(2007).

# EFFECTS OF CORROSION

modify the mechanical response of the reinforcement

Equilibrium in proximity to the region of maximum pit

$$\varepsilon_u^{out} = \begin{cases} \varepsilon_{u0} - (\varepsilon_{u0} - \varepsilon_{sh0}) \left( \frac{f_{u0}}{f_{u0} - f_{y0}} \eta_{max} \right)^P & \eta_{max} < \eta_{crit} \\ \in [\varepsilon_{y0}, \varepsilon_{sh0}] & \eta_{max} = \eta_{crit} \\ \frac{f_{y0} \varepsilon_{y0}}{f_{y0}} (1 - \eta_{max}) & \eta_{max} > \eta_{crit} \end{cases}$$

$\eta_{crit}$  : critical load corrosion level  
 $\eta_{crit} = 1 - \frac{f_{y0}}{f_{u0}}$   
 $P$  : strain-hardening power  
 $P = E_{sh0} \frac{\varepsilon_{u0} - \varepsilon_{sh0}}{f_{u0} - f_{y0}}$

$$\sigma_u^{out} A_0 = f_{u0} A_{min}$$

reduce the resisting section of reinforcement (through the reduction of the reinforcement ratio)

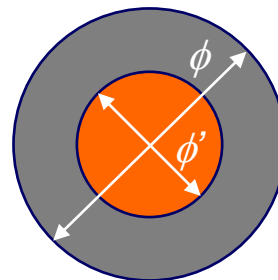

Chen E., Berrocal C., Fernandez I., Lofgren I., Lundgren K. Assessment of the mechanical behaviour of reinforcement bars with localised pitting corrosion by Digital Image Correlation. *Engineering Structures*, 219(2020).

| Example for T = 70 years |          |          |          |         |
|--------------------------|----------|----------|----------|---------|
| Panel CA3                |          |          |          |         |
| Exposure Class           | Uncor.   | XS1      | XS2      | XS3     |
| $f_y$ [MPa]              | 425.4    | 425.4    | 425.4    | 282.1   |
| $f_u$ [MPa]              | 541.0    | 490.3    | 530.6    | 282.1   |
| $\varepsilon_y$          | 0.002127 | 0.002127 | 0.002127 | 0.00141 |
| $\varepsilon_u$          | 0.06     | 0.03457  | 0.05475  | 0.00141 |
| $\phi$ [mm]              | 19       |          |          |         |
| $\eta_{max}$             | 0.0      | 0.09     | 0.02     | 0.48    |
| $f_c$ [MPa]              | 44.50    | 38.57    | 44.50    | 32.96   |



# EFFECTS OF CORROSION

Coronelli D. and Gambarova P., (2004). Structural Assessment of Corroded Reinforced Concrete Beams: Modeling Guidelines. Journal of Structural Engineering, 130(8):1214-1224.

determine the cracking of the surrounding concrete

Coronelli and Gambarova (2004)

$$f_c' = \frac{f_c}{1 + k \frac{\varepsilon_1}{\varepsilon_{c0}}}$$

$f_c$  : compressive strength of undamaged concrete  
 $k$  : coefficient related to the bar roughness and diameter (0.1)  
 $\varepsilon_1$  : average strain in the cracked concrete at right angles to the direction of the applied compression  
 $\varepsilon_{c0}$  : concrete strain at maximum compressive strength  $f_c$

$$\varepsilon_1 = \frac{(b_f - b_0)}{b_0} = \frac{n_{bars} w_{cr}}{b_0}$$

$w_{cr}$  : total crack width for a given corrosion level  
 $b_0$  : uncorroded section width

$$A_s = (1 - 2.1\eta_{average}) A_{s0} \Rightarrow \eta_{average} = \frac{A_{s0} - A_s}{2.1A_{s0}} = \frac{\eta_{max}}{2.1}$$

$$w_{cr} = w_{c,max} = K \ln \frac{\eta_{average}}{\eta_{cr}} \quad \left\{ \begin{array}{l} \eta_{cr} = 1 - \left[ 1 - \frac{\alpha}{d_0} \left( 7.53 + 9.32 \frac{c}{d_0} \right) 10^{-3} \right]^2 \\ \alpha = \frac{2(1 - \sqrt{1 - 2.1\eta_{average}})}{1 - \sqrt{1 - \eta_{average}}} \end{array} \right.$$

$$K = 2 \left( \frac{c}{d_0} \right) 10^3 + 0.22$$

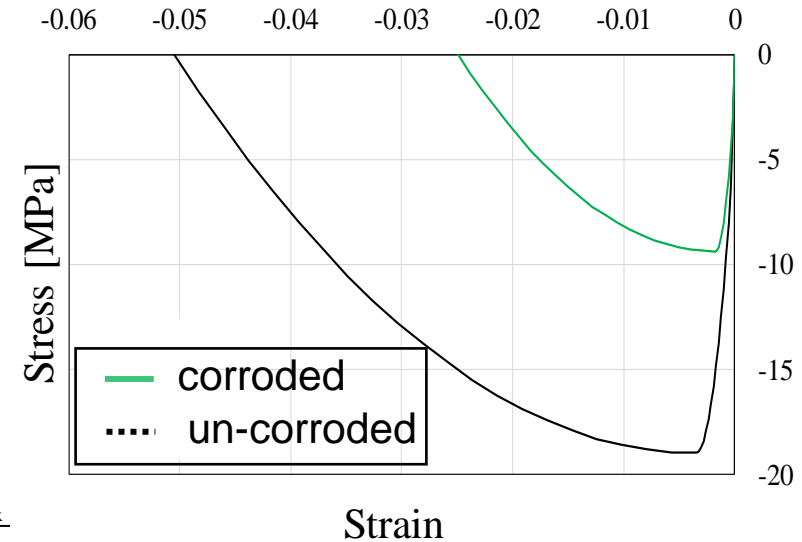

$A_s$  : minimum residual cross-section area of reinforcement  
 $\eta_{average}$  : average cross-sectional loss of the corroded rebar  
 $A_{s0}$  : initial uncorroded cross-section area of reinforcement  
 $c$  : thickness of concrete cover  
 $d_0$  : uncorroded reinforcement diameter

Xia J., Jin W-L. (2014). "Prediction of corrosion-induced crack width of corroded reinforced concrete structures. 4<sup>th</sup> International Conference on the Durability of Concrete Structures 24-26 July 2014.

# MODEL VALIDATION

Mansour Mohamad and Hsu Thomas T. C (2005). Behaviour of Reinforced Concrete Elements under Cyclic Shear. I: Experiments. Journal of Structural Engineering, 131(19):44-53.

The materials used for the test:

► Longitudinal and transversal reinforcement are the same

| Specimen | Concrete    |                     |             | Steel       |             |             |             |
|----------|-------------|---------------------|-------------|-------------|-------------|-------------|-------------|
|          | $f_c$ [Mpa] | $\epsilon_{c0}$ [-] | $E_c$ [Mpa] | $f_y$ [Mpa] | $f_u$ [Mpa] | $E_s$ [Mpa] | $E_h$ [Mpa] |
| CE3      | 50          | 0.0024              | 35909.49    | 425.4       | 541.1       | 200000      | 2000        |
| CE4      | 47          | 0.0022              | 35176.44    | 453.4       | 569.0       | 200000      | 2000        |
| CA3      | 44.5        | 0.0024              | 34541.35    | 425.4       | 541.1       | 200000      | 2000        |
| CA4      | 45          | 0.0028              | 34670.24    | 453.4       | 569.0       | 200000      | 2000        |

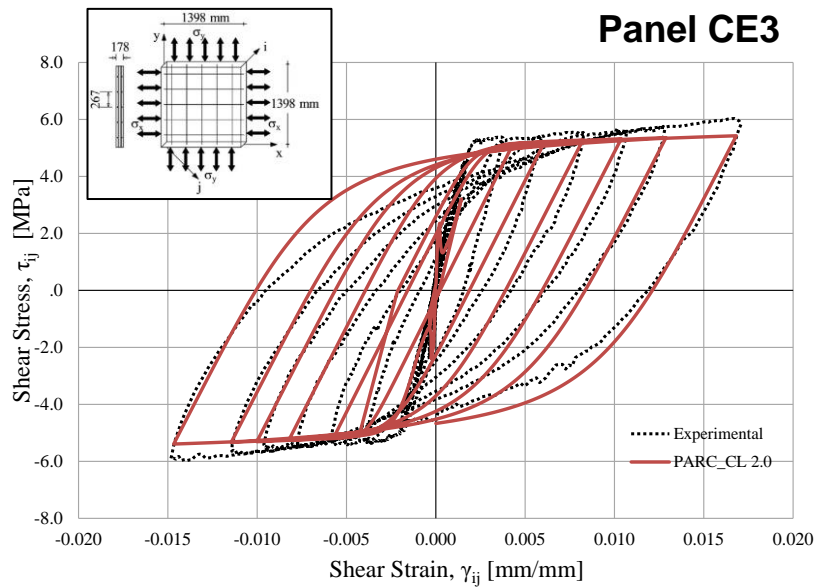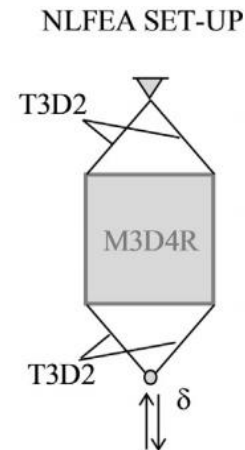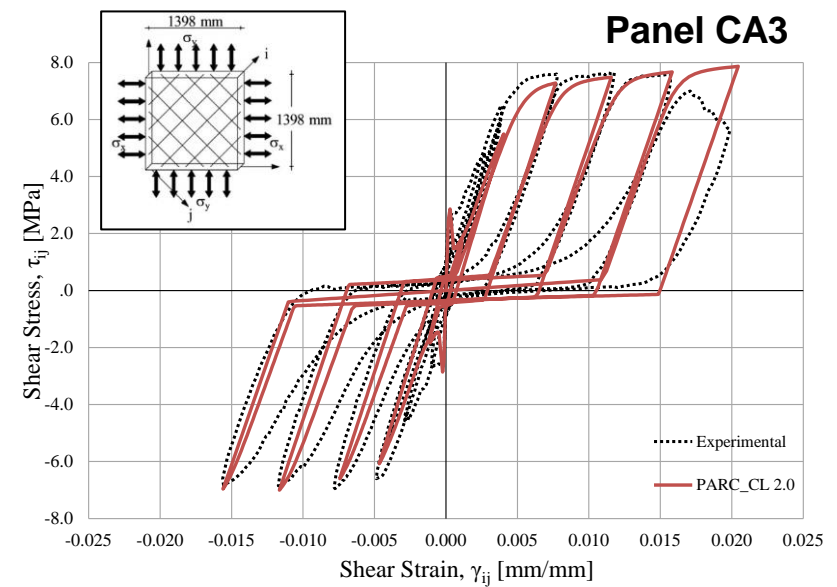

Belletti B., Scolari M., Vecchi F. (2017). PARC\_CL 2.0 crack model for NLFEA of reinforced concrete structures. Computers and Structures, 191:165-179.

# MAIN RESULTS

## Evaluation of corrosion deterioration

### ULTIMATE POINT

$$M^+ = f(\tau_{\max}^+, \gamma_{\max}^+)$$

$$M^- = f(\tau_{\max}^-, \gamma_{\max}^-)$$

### YIELDING POINT

$$Y^+ = f(\tau_y^+, \gamma_y^+)$$

$$Y^- = f(\tau_y^-, \gamma_y^-)$$

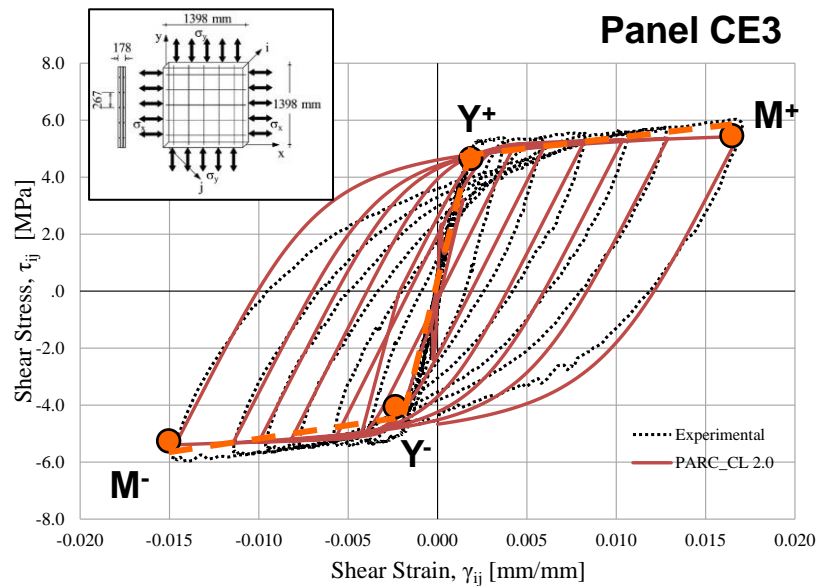

### MAIN PARAMETERS

- ❖ Reduction in terms of maximum shear stress and maximum shear strain
- ❖ Preyield Shear Stiffness 
$$K_\gamma = \frac{\tau_y}{\gamma_y}$$

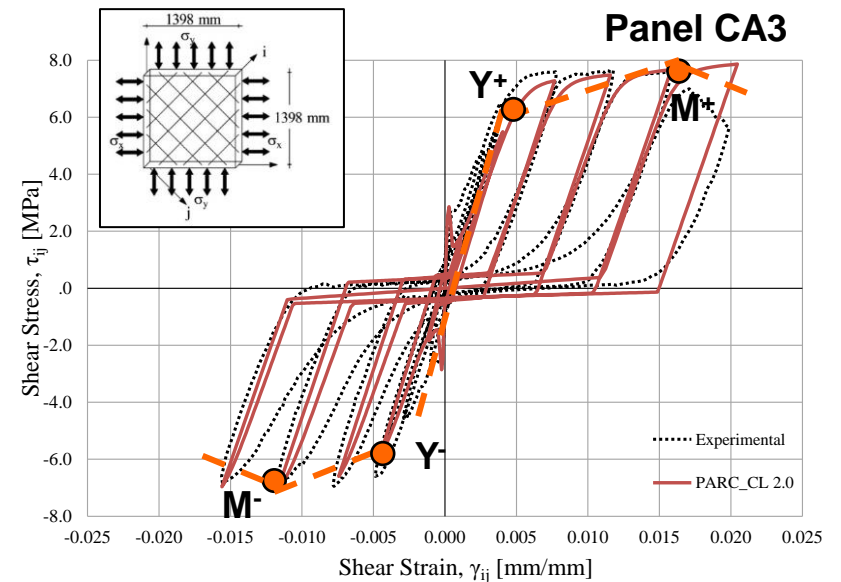

# MAIN RESULTS

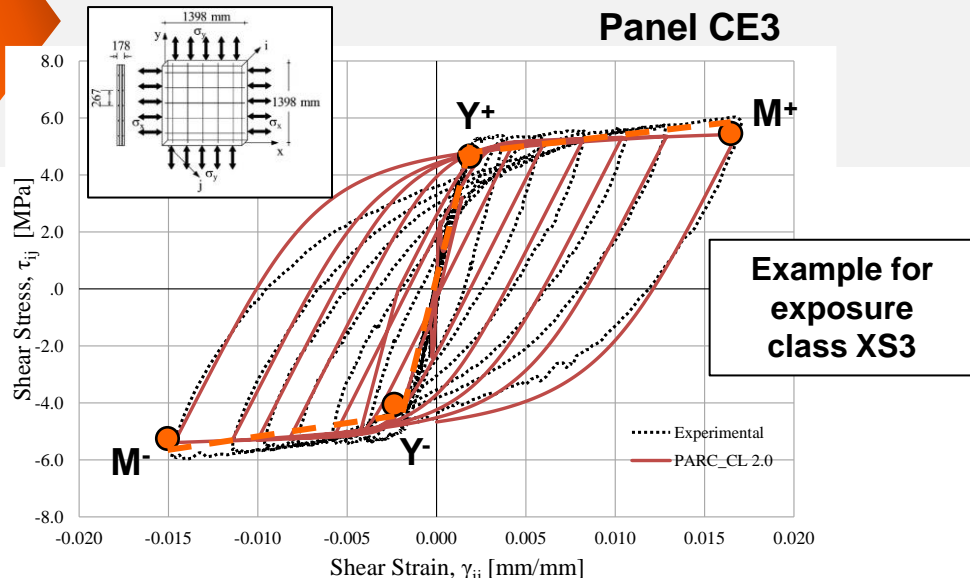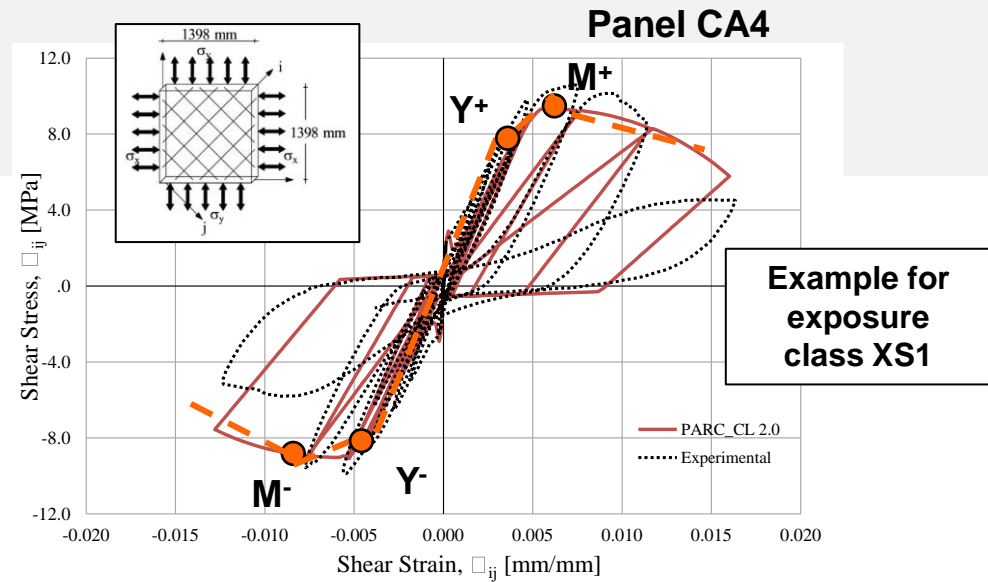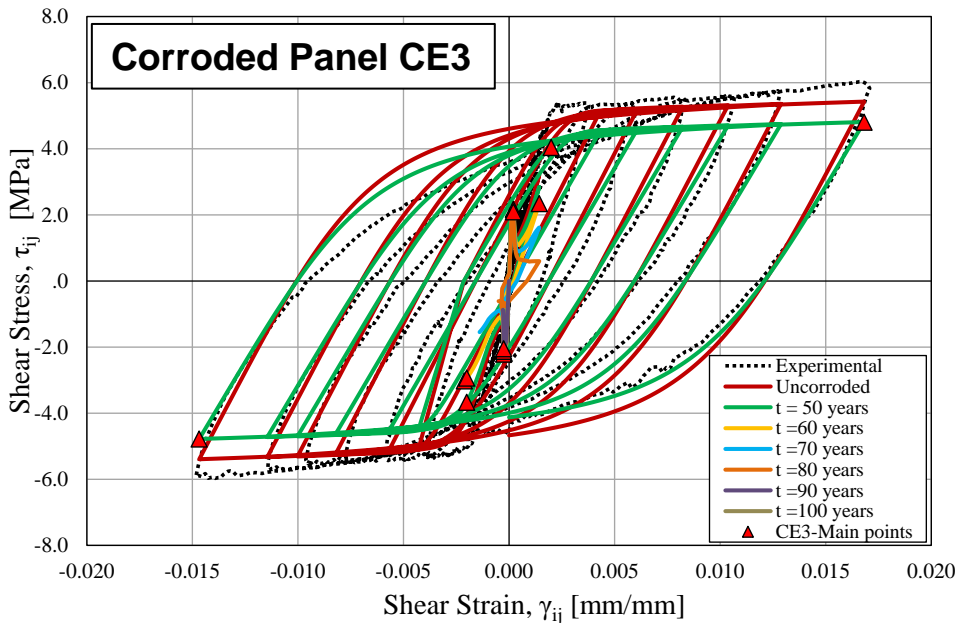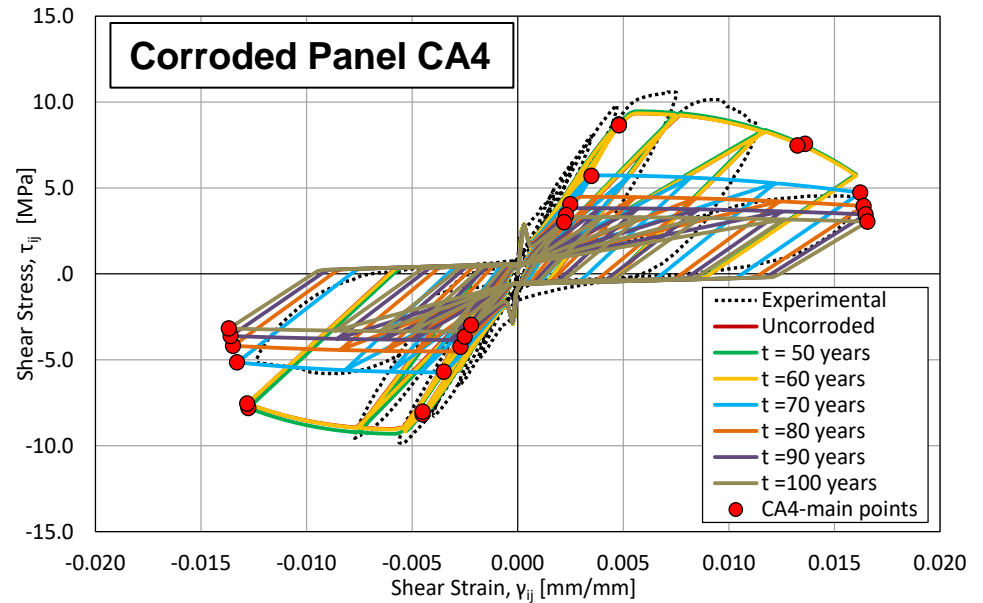

# MAIN RESULTS

## Maximum Shear Stress

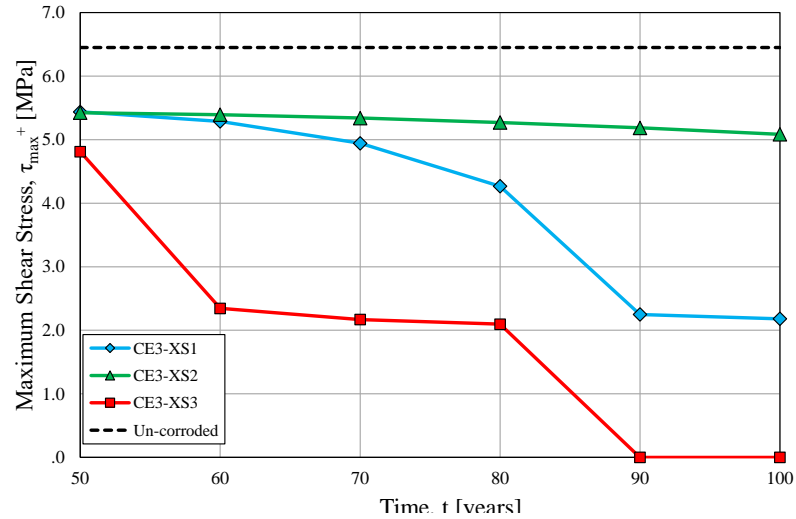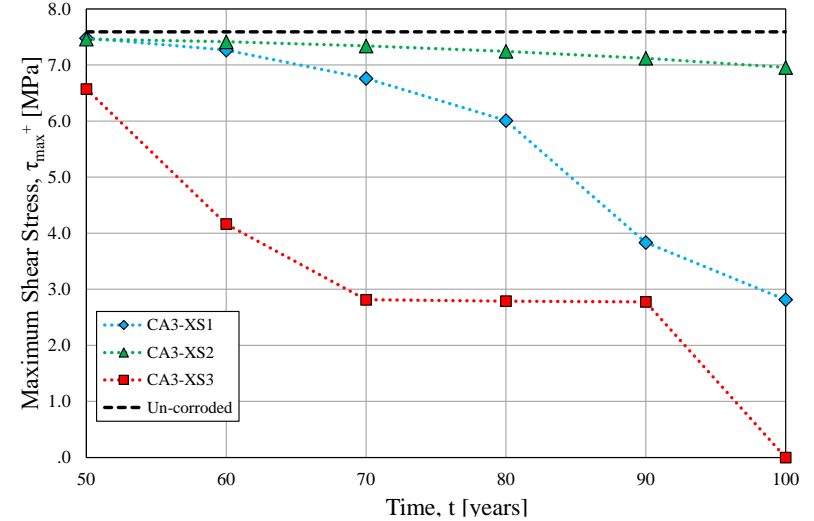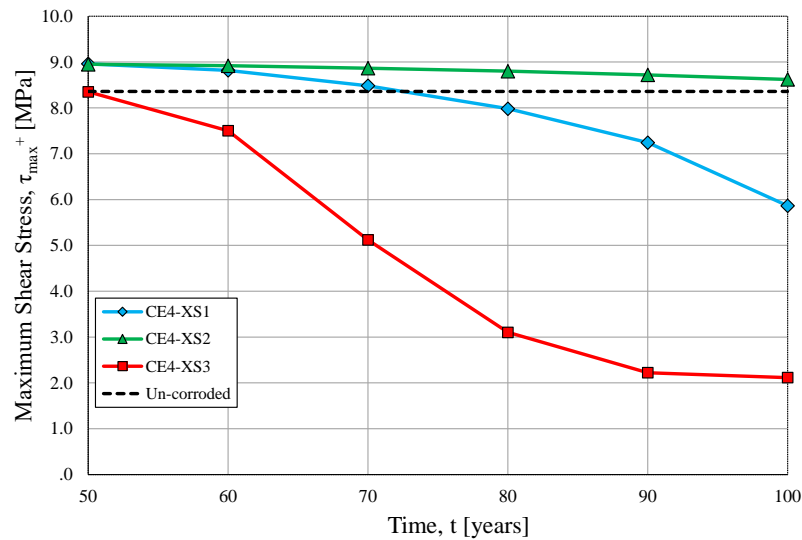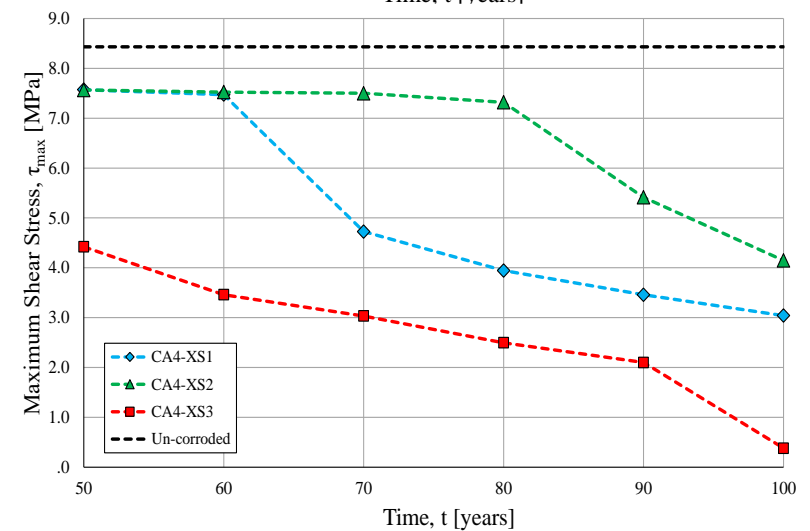



# MAIN RESULTS

## Preyield Shear Stiffness

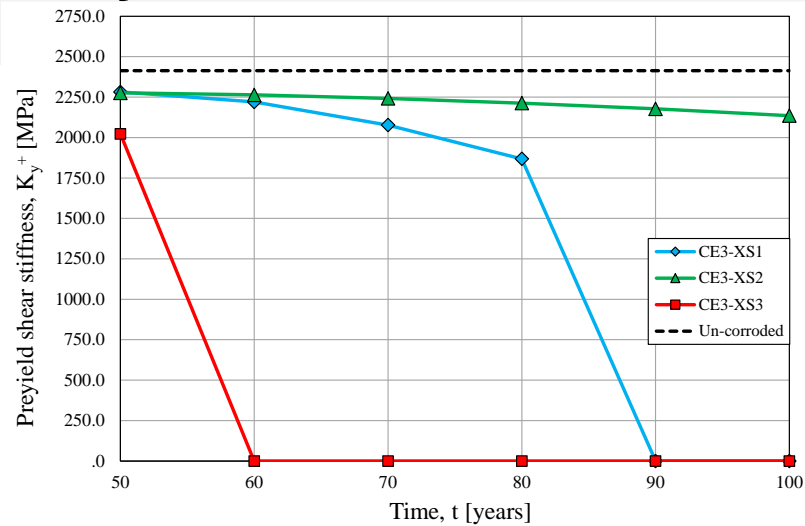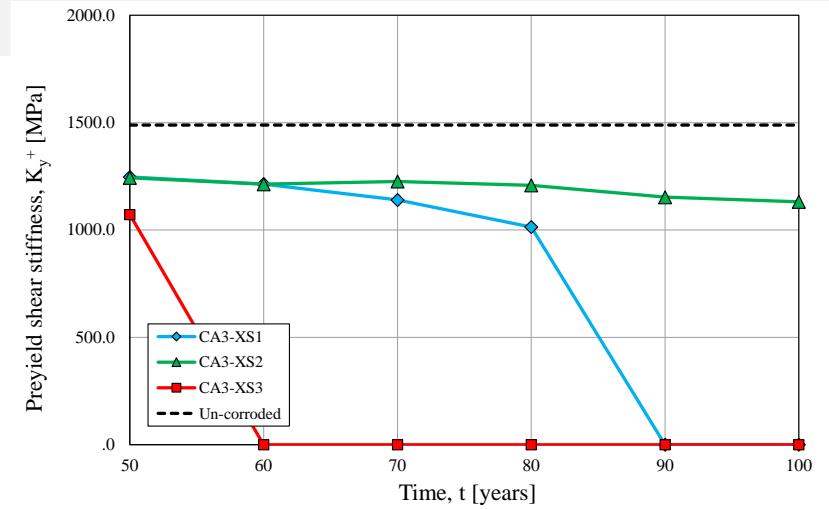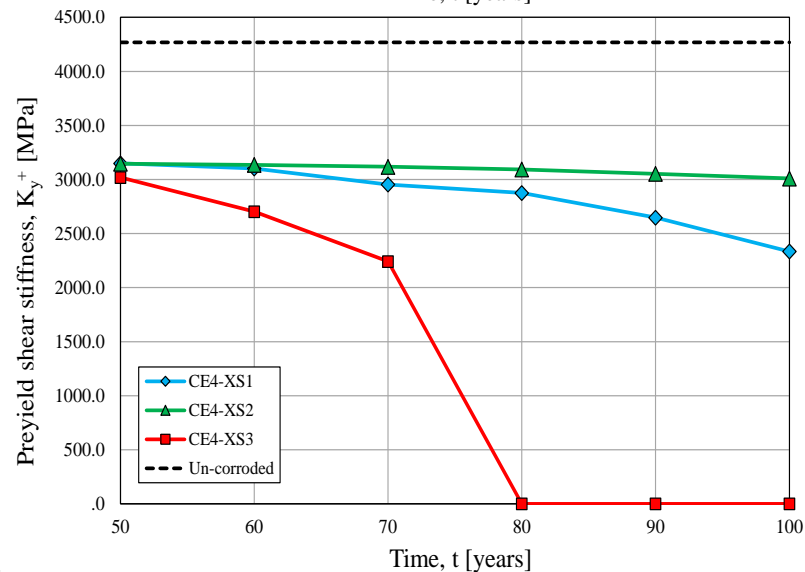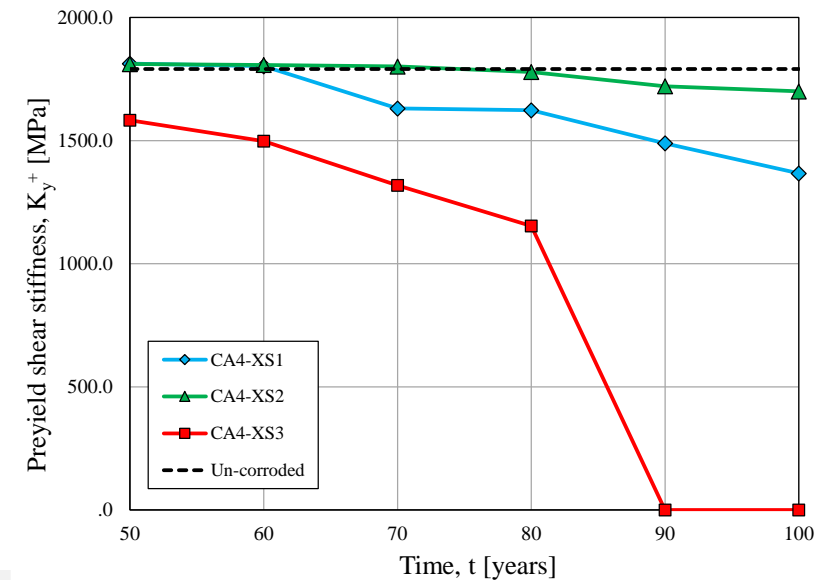

# Conclusions

- 1** NLFEA are useful tools for the prediction of seismic behaviour of existing concrete structures, that once validated can be used instead of more expensive experimental tests. In this work, the PARC\_CL model is used.
- 2** The un-corroded panels show higher resistance and ductility under cyclic load than the corroded panels;
- 3** Referring to shear stress, the higher reduction over the time is recorded for the exposure class XS3 – wet and dry condition – while the lowest reduction in terms of shear stress is recorded for the exposure class XS2 – submerged condition.
- 4** Over the time, a general reduction of preyield shear stiffness due to corrosion deterioration is observed.

## Future research are now ongoing:

- ▶ to estimate the contribution provided by creep and shrinkage effect over the time;
- ▶ to evaluate the response of corroded RC panels with different longitudinal and transversal reinforcement ratio.
- ▶ to investigate the buckling phenomenon of compressed steel reinforcement;

Local effect produces  
global consequences

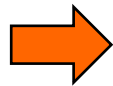

It significantly modifies the  
**seismic response**  
reducing the **capacity**  
both in terms of **strength**  
and **ductility**

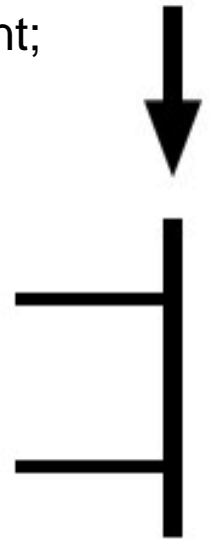

ONLINE

# CACRCS DAYS 2021

Capacity assessment of corroded  
reinforced concrete structures

30 November - 3 December 2021

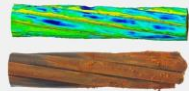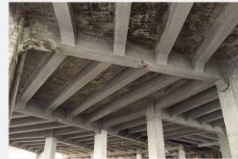

From research to daily  
engineering evaluation

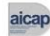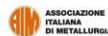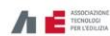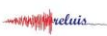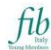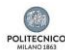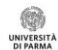

Organization by  
[www.cte-eventi.com](http://www.cte-eventi.com)

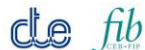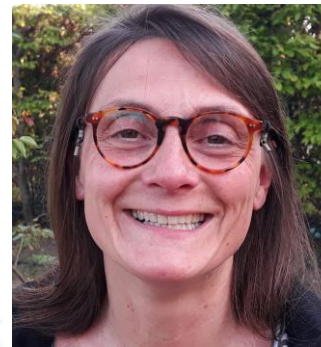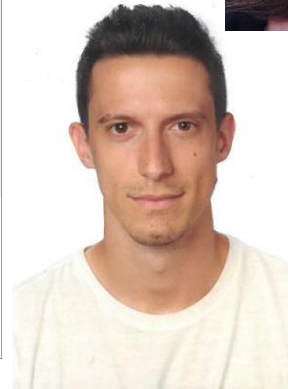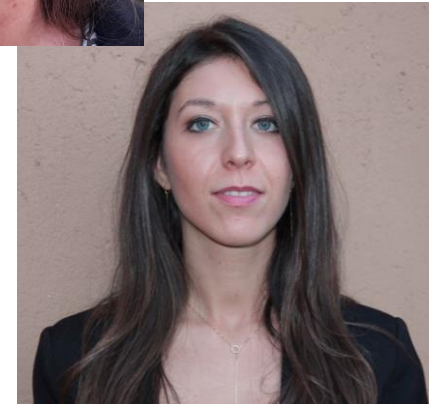

CMDWC  
2021

# THANK YOU FOR YOUR ATTENTION!

## CMDWC 2021

### 1<sup>st</sup> Corrosion and Materials Degradation Web Conference

17-19 May 2021 | International Workshop Online

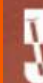

corrosion and  
materials degradation

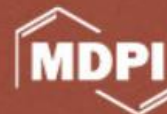

Supplement: s1 [file s1]
